# Supplementary material for: Surface Plasmon Resonance Based on Molecularly Imprinted Polymeric Film for l-Phenylalanine Detection
Source: Biosensors (Basel). 2021 Jan 15;11(1):21. doi: 10.3390/bios11010021 (PMC7830203; doi:10.3390/bios11010021)
Supplement: Supplementary file 1 [file biosensors-11-00021-s001.pdf]

## Supplementary material

### Surface plasmon resonance based on molecularly imprinted polymeric film for L-phenylalanine detection

Duygu Çimen, Nilay Bereli, Adil Denizli\*

Hacettepe University, Department of Chemistry, Beytepe, Ankara, Turkey

**Table S1.** Isotherm parameters for SPR sensors.

| Langmuir                   | Freundlich                 | Langmuir-Freundlich        |
|----------------------------|----------------------------|----------------------------|
| $\Delta R_{\max}$ : 53.19  | $\Delta R_{\max}$ : 147.94 | $\Delta R_{\max}$ : 42.35  |
| $K_D$ (1/ $\mu$ M) : 0.365 | 1/n : 0.9183               | 1/n : 0.9183               |
| $K_A$ ( $\mu$ M) : 2.743   | $R^2$ : 0.933              | $K_D$ (1/ $\mu$ M) : 4.475 |
| $R^2$ : 0.984              |                            | $K_A$ ( $\mu$ M) : 0.173   |
|                            |                            | $R^2$ : 0.953              |

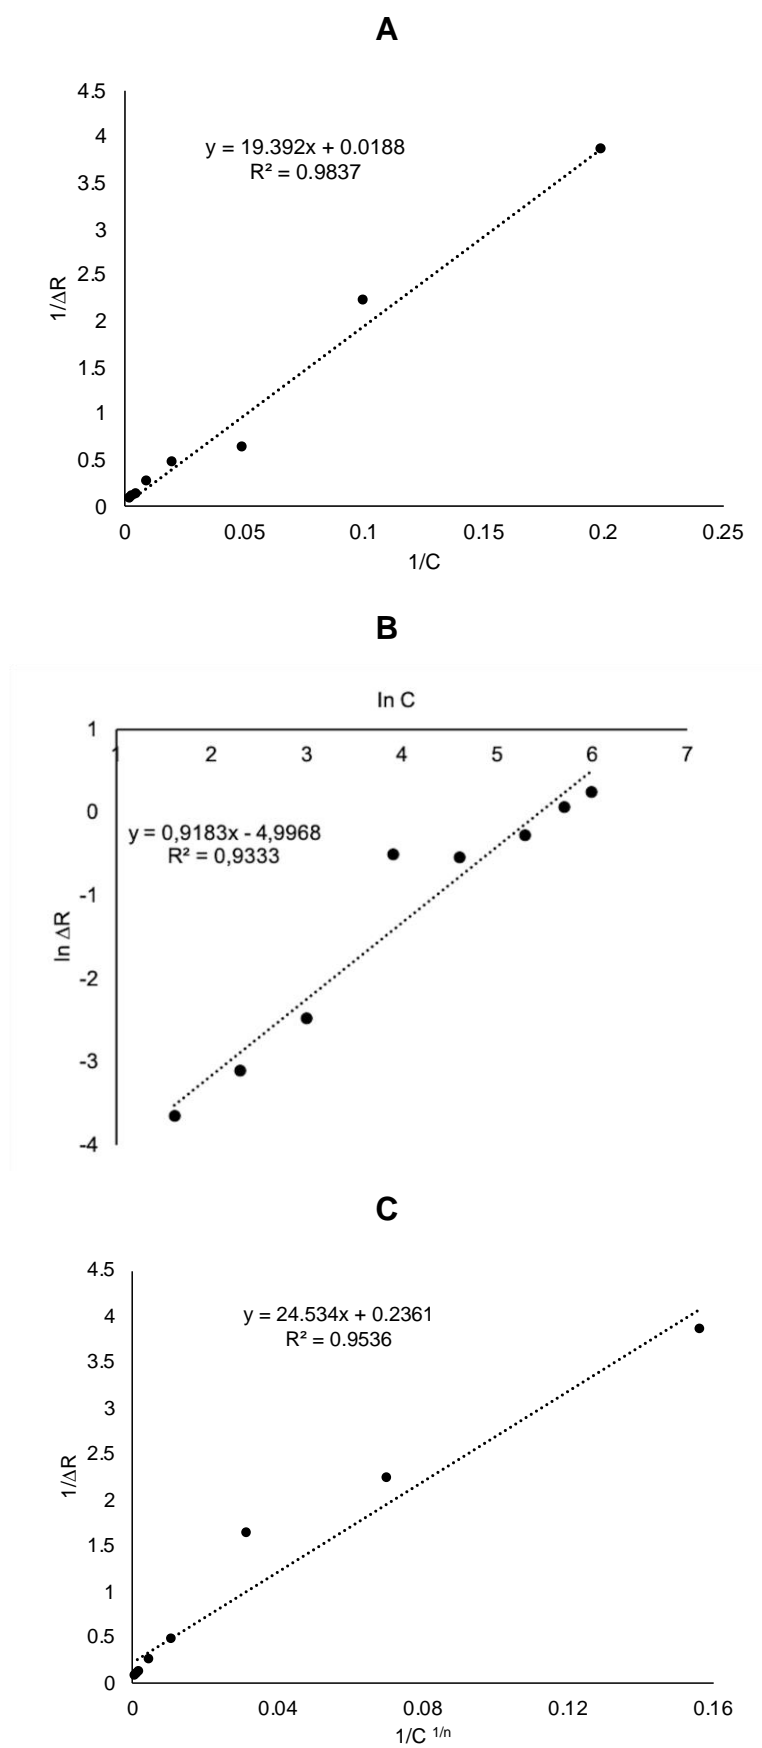

**Fig S1.** Langmuir (A), Freundlich (B) and Langmuir-Freundlich (C) adsorption models for SPR sensors.

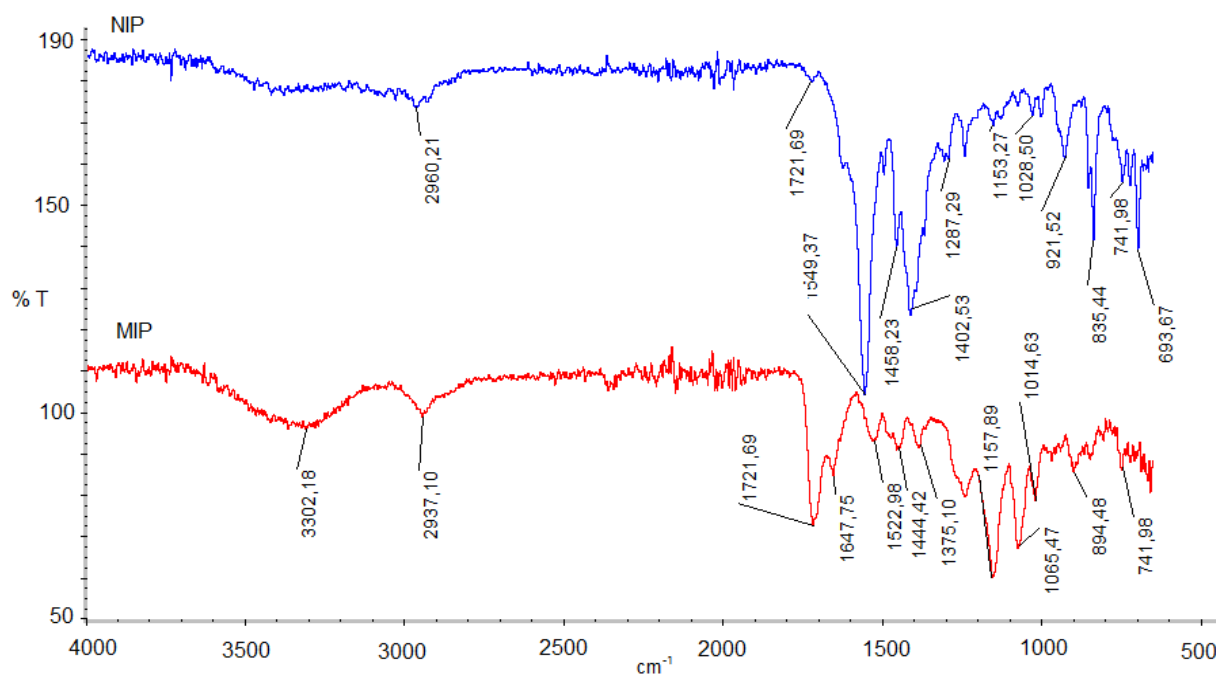

**Fig S2.** FTIR spectrums of non-imprinted (NIP) and L-Phe imprinted (MIP) polymer coated SPR sensor surface.

The FTIR spectrums were obtained in the frequency region 4000-500  $\text{cm}^{-1}$  (FTIR 8000 Series, Shimadzu, Japan). At FTIR-ATR spectrums of non-imprinted (NIP) and L-Phe imprinted (MIP) polymeric films were determined in Figure S2. The incorporation of MAPA monomer into the polymer structure was confirmed with the FTIR spectrum, which contains strong aromatic C-H stretching band at 1025  $\text{cm}^{-1}$  and aromatic C-C stretching band around 1500  $\text{cm}^{-1}$  [1]. The characteristic bands at 3300  $\text{cm}^{-1}$  and 1444  $\text{cm}^{-1}$  due to NH asymmetric and COO- stretching confirmed the existence of amino group. The strong band at 2937  $\text{cm}^{-1}$  established the presence of  $\text{CH}_2$  asymmetric stretching. The bands at 884  $\text{cm}^{-1}$  established the presence of substituted ring 1,4 distribution. It confirmed that polymerization was successfully done and L-Phe were placed toward the SPR sensor surfaces [2].

#### References:

1. Akgönüllü, S.; Yavuz, H.; Denizli, A. Preparation of imprinted cryogel cartridge for chiral separation of L-phenylalanine, *Artif Cells Nanomed Biotechnol* **2017**, 45, 800–807.
2. Mahalakshmi, R.; Jesuraja, S.X.; Jerome Das, S. Growth and characterization of L-phenylalanine, *Cryst. Res. Technol* **2006**, 41, 780 – 783.
